# Supplementary material for: Selection of the best plasma reactor for the diamond chemical vapor deposition operation of waste materials using multi-criteria decision-making models
Source: Research Square preprint supplement (doi:10.21203/rs.3.rs-398564/v1), 2021-04-06
Supplement: Supplementary file 1 [file 5e968416b1bc397c4f849c7a.xlsx]

## Sheet: Sheet1
																														14	13	12	11	10	9	8	7	6	5	4	3	2	1
															14	13	12	11	10	9	8	7	6	5	4	3	2	1		pij	pij	pij	pij	pij	pij	pij	pij	pij	pij	pij	pij	pij	pij		C14	C13	C12	C11	C10
															-2.02438	-2.07944	-1.89712	-3.04452	-2.07944	-1.96611	-2.0149	-2.14007	-2.07944	-2.07944	-1.92529	-2.00533	-2.00533	-1.83828		0.132075	0.125	0.15	0.047619	0.125	0.14	0.133333	0.117647	0.125	0.125	0.145833	0.134615	0.134615	0.159091		7	6	6	1	7
															-2.02438	-2.07944	-2.30259	-1.25276	-2.07944	-1.96611	-2.19722	-1.7346	-2.07944	-2.07944	-3.17805	-2.15948	-2.15948	-3.09104		0.132075	0.125	0.1	0.285714	0.125	0.14	0.111111	0.176471	0.125	0.125	0.0416667	0.115385	0.115385	0.0454545		7	6	4	6	7
															-2.02438	-2.07944	-2.30259	-1.25276	-2.07944	-1.96611	-2.19722	-1.7346	-2.07944	-2.07944	-2.07944	-2.15948	-2.15948	-1.99243		0.132075	0.125	0.1	0.285714	0.125	0.14	0.111111	0.176471	0.125	0.125	0.125	0.115385	0.115385	0.136364		7	6	4	6	7
															-2.02438	-2.07944	-1.89712	-3.04452	-2.07944	-1.96611	-2.0149	-2.14007	-2.07944	-2.07944	-1.92529	-2.00533	-2.00533	-1.83828		0.132075	0.125	0.15	0.047619	0.125	0.14	0.133333	0.117647	0.125	0.125	0.145833	0.134615	0.134615	0.159091		7	6	6	1	7
															-2.584	-2.07944	-2.30259	-3.04452	-2.07944	-1.96611	-2.42037	-2.83321	-2.07944	-2.07944	-1.92529	-2.34181	-2.34181	-2.68558		0.0754717	0.125	0.1	0.047619	0.125	0.14	0.0888889	0.0588235	0.125	0.125	0.145833	0.0961538	0.0961538	0.0681818		4	6	4	1	7
															-2.02438	-2.07944	-1.89712	-3.04452	-2.07944	-1.96611	-2.0149	-2.83321	-2.07944	-2.07944	-1.92529	-2.00533	-2.00533	-1.83828		0.132075	0.125	0.15	0.047619	0.125	0.14	0.133333	0.0588235	0.125	0.125	0.145833	0.134615	0.134615	0.159091		7	6	6	1	7
															-2.02438	-2.07944	-2.30259	-1.65823	-2.07944	-1.96611	-2.0149	-1.7346	-2.07944	-2.07944	-2.07944	-2.00533	-2.00533	-1.99243		0.132075	0.125	0.1	0.190476	0.125	0.14	0.133333	0.176471	0.125	0.125	0.125	0.134615	0.134615	0.136364		7	6	4	4	7
															-2.02438	-2.07944	-1.89712	-3.04452	-2.07944	-3.91202	-1.86075	-2.14007	-2.07944	-2.07944	-2.07944	-2.00533	-2.00533	-1.99243		0.132075	0.125	0.15	0.047619	0.125	0.02	0.155556	0.117647	0.125	0.125	0.125	0.134615	0.134615	0.136364		7	6	6	1	7
																																													53	48	40	21	56
																																							LN	K
																																						0.480898	2.07944
																																											1
																																						Wj		E1		1	pij
																																									-0.292454	-1.83828	0.159091
																																									-0.140502	-3.09104	0.0454545
																																									-0.271695	-1.99243	0.136364
																																									-0.292454	-1.83828	0.159091
																																									-0.183108	-2.68558	0.0681818
																																									-0.292454	-1.83828	0.159091
																																									-0.271695	-1.99243	0.136364
																																									-0.271695	-1.99243	0.136364
																																						0.0998917	0.0304824	0.969518	-2.01606
																																											2
																																						Wj		E1		2	pij
																																									-0.269949	-2.00533	0.134615
																																									-0.249171	-2.15948	0.115385
																																									-0.249171	-2.15948	0.115385
																																									-0.269949	-2.00533	0.134615
																																									-0.225174	-2.34181	0.0961538
																																									-0.269949	-2.00533	0.134615
																																									-0.269949	-2.00533	0.134615
																																									-0.269949	-2.00533	0.134615
																																						0.00974176	0.00297274	0.997027	-2.07326
																																											3
																																						Wj		E1		3	pij
																																									-0.269949	-2.00533	0.134615
																																									-0.249171	-2.15948	0.115385
																																									-0.249171	-2.15948	0.115385
																																									-0.269949	-2.00533	0.134615
																																									-0.225174	-2.34181	0.0961538
																																									-0.269949	-2.00533	0.134615
																																									-0.269949	-2.00533	0.134615
																																									-0.269949	-2.00533	0.134615
																																						0.00974176	0.00297274	0.997027	-2.07326
																																											4
																																						Wj		E1		4	pij
																																									-0.280772	-1.92529	0.145833
																																									-0.132419	-3.17805	0.0416667
																																									-0.25993	-2.07944	0.125
																																									-0.280772	-1.92529	0.145833
																																									-0.280772	-1.92529	0.145833
																																									-0.280772	-1.92529	0.145833
																																									-0.25993	-2.07944	0.125
																																									-0.25993	-2.07944	0.125
																																						0.0695701	0.0212296	0.97877	-2.0353
																																											5
																																						Wj		E1		5	pij
																																									-0.25993	-2.07944	0.125
																																									-0.25993	-2.07944	0.125
																																									-0.25993	-2.07944	0.125
																																									-0.25993	-2.07944	0.125
																																									-0.25993	-2.07944	0.125
																																									-0.25993	-2.07944	0.125
																																									-0.25993	-2.07944	0.125
																																									-0.25993	-2.07944	0.125
																																						0	0	1	-2.07944
																																											6
																																						Wj		E1		6	pij
																																									-0.25993	-2.07944	0.125
																																									-0.25993	-2.07944	0.125
																																									-0.25993	-2.07944	0.125
																																									-0.25993	-2.07944	0.125
																																									-0.25993	-2.07944	0.125
																																									-0.25993	-2.07944	0.125
																																									-0.25993	-2.07944	0.125
																																									-0.25993	-2.07944	0.125
																																						0	0	1	-2.07944
																																											7
																																						Wj		E1		7	pij
																																									-0.251772	-2.14007	0.117647
																																									-0.306106	-1.7346	0.176471
																																									-0.306106	-1.7346	0.176471
																																									-0.251772	-2.14007	0.117647
																																									-0.16666	-2.83321	0.0588235
																																									-0.16666	-2.83321	0.0588235
																																									-0.306106	-1.7346	0.176471
																																									-0.251772	-2.14007	0.117647
																																						0.114233	0.0348587	0.965141	-2.00695
																																											8
																																						Wj		E1		8	pij
																																									-0.268654	-2.0149	0.133333
																																									-0.244136	-2.19722	0.111111
																																									-0.244136	-2.19722	0.111111
																																									-0.268654	-2.0149	0.133333
																																									-0.215144	-2.42037	0.0888889
																																									-0.268654	-2.0149	0.133333
																																									-0.268654	-2.0149	0.133333
																																									-0.28945	-1.86075	0.155556
																																						0.0188484	0.00575167	0.994248	-2.06748
																																											9
																																						Wj		E1		9	pij
																																									-0.275256	-1.96611	0.14
																																									-0.275256	-1.96611	0.14
																																									-0.275256	-1.96611	0.14
																																									-0.275256	-1.96611	0.14
																																									-0.275256	-1.96611	0.14
																																									-0.275256	-1.96611	0.14
																																									-0.275256	-1.96611	0.14
																																									-0.0782405	-3.91202	0.02
																																						0.117265	0.0357839	0.964216	-2.00503
																																										10
																																					Wj		E1		10	pij
																																								-0.25993	-2.07944	0.125
																																								-0.25993	-2.07944	0.125
																																								-0.25993	-2.07944	0.125
																																								-0.25993	-2.07944	0.125
																																								-0.25993	-2.07944	0.125
																																								-0.25993	-2.07944	0.125
																																								-0.25993	-2.07944	0.125
																																								-0.25993	-2.07944	0.125
																																					0	0	1	-2.07944
																																									11
																																				Wj		E1		11	pij
																																							-0.144977	-3.04452	0.047619
																																							-0.357932	-1.25276	0.285714
																																							-0.357932	-1.25276	0.285714
																																							-0.144977	-3.04452	0.047619
																																							-0.144977	-3.04452	0.047619
																																							-0.144977	-3.04452	0.047619
																																							-0.315853	-1.65823	0.190476
																																							-0.144977	-3.04452	0.047619
																																				0.508766	0.155252	0.844748	-1.7566
																																								12
																																			Wj		E1		12	pij
																																						-0.284568	-1.89712	0.15
																																						-0.230259	-2.30259	0.1
																																						-0.230259	-2.30259	0.1
																																						-0.284568	-1.89712	0.15
																																						-0.230259	-2.30259	0.1
																																						-0.284568	-1.89712	0.15
																																						-0.230259	-2.30259	0.1
																																						-0.284568	-1.89712	0.15
																																			0.0317319	0.00968314	0.990317	-2.05931
																																							13
																																		Wj		E1		13	pij
																																					-0.25993	-2.07944	0.125
																																					-0.25993	-2.07944	0.125
																																					-0.25993	-2.07944	0.125
																																					-0.25993	-2.07944	0.125
																																					-0.25993	-2.07944	0.125
																																					-0.25993	-2.07944	0.125
																																					-0.25993	-2.07944	0.125
																																					-0.25993	-2.07944	0.125
																																		0	0	1	-2.07944
																																											14
																																						Wj		E1		14	pij
																																									-0.267371	-2.02438	0.132075
																																									-0.267371	-2.02438	0.132075
																																									-0.267371	-2.02438	0.132075
																																									-0.267371	-2.02438	0.132075
																																									-0.195019	-2.584	0.0754717
																																									-0.267371	-2.02438	0.132075
																																									-0.267371	-2.02438	0.132075
																																									-0.267371	-2.02438	0.132075
																																						0.0202106	0.00616734	0.993833	-2.06662
																																							SUM dj
																																							0.305154
[truncated: 10 more columns]
